# Supplementary material for: Identifying the receptor subtype selectivity of retinoid X and retinoic acid receptors via quantum mechanics
Source: PubMed Central journal article supplement (PMC5337894; doi:10.1002/2211-5463.12188), 2017-02-05
Supplement: FEB4-7-391-s001.pdf [file FEB4-7-391-s001.pdf]

## Supporting Information

# Identifying the receptor subtype selectivity of retinoid X and retinoic acid receptors via quantum mechanics

Motonori Tsuji,<sup>\*1</sup> Koichi Shudo,<sup>2</sup> and Hiroyuki Kagechika<sup>3</sup>

<sup>1</sup> Institute of Molecular Function, 2-105-14 Takasu, Misato-shi, Saitama 341-0037, Japan

<sup>2</sup> Japan Pharmaceutical Information Center, 2-12-15 Shibuya, Shibuya-ku, Tokyo 150-0002, Japan

<sup>3</sup> Institute of Biomaterials and Bioengineering, Tokyo Medical and Dental University, 2-3-10 Kanda-Surugadai, Chiyoda-ku, Tokyo 101-0062, Japan

E-mail: motonori@molfuction.com

### Contents

The correlations between  $\Delta G^{\text{bind}}(\text{exp})$  and interaction energies of the most stable complex obtained from the biomacromolecule- and ligand-flexible docking simulations.

**S2-S3**

Receptor information used in this study.

**S3**

References

**S4**

**Table S1.** Experimental  $\Delta G^{\text{bind}}$  values [1] and calculated interaction energies of naturally occurring and synthetic retinoids.

| Receptor                        | Ligand  | $\Delta G^{\text{bind}}(\text{exp})^{\text{a}}$<br>(kcal/mol) | Docking IE<br>(kcal/mol) | Flexible<br>Docking IE<br>(kcal/mol) |
|---------------------------------|---------|---------------------------------------------------------------|--------------------------|--------------------------------------|
| hRXR $\alpha$<br>(PDB ID: 1FM9) | ATRA    | -8.81                                                         | -81.83                   | -96.28                               |
|                                 | 9cRA    | -10.76                                                        | -94.41                   | -98.00                               |
|                                 | Am80    | nb <sup>b</sup>                                               | nh <sup>d</sup>          | nh <sup>d</sup>                      |
|                                 | LGD1069 | -10.59                                                        | -87.55                   | -98.13                               |
| hRXR $\beta$<br>(PDB ID: 1UHL)  | ATRA    | -9.87                                                         | -89.36                   | -102.94                              |
|                                 | 9cRA    | -11.44                                                        | -97.08                   | -104.40                              |
|                                 | Am80    | nb <sup>b</sup>                                               | nh <sup>d</sup>          | nh <sup>d</sup>                      |
|                                 | LGD1069 | -11.18                                                        | -87.77                   | -77.02                               |
| hRXR $\gamma$<br>(Model)        | ATRA    | -9.40                                                         | -78.60                   | -83.12                               |
|                                 | 9cRA    | -10.81                                                        | -83.76                   | -83.96                               |
|                                 | Am80    | nb <sup>b</sup>                                               | nh <sup>d</sup>          | nh <sup>d</sup>                      |
|                                 | LGD1069 | -10.98                                                        | -72.02                   | -78.99                               |
| hRAR $\alpha$<br>(PDB ID: 3A9E) | ATRA    | -11.52                                                        | -95.94                   | -101.01                              |
|                                 | 9cRA    | nd <sup>c</sup>                                               | -94.03                   | -94.41                               |
|                                 | Am80    | -11.12                                                        | -101.63                  | -103.84                              |
|                                 | LGD1069 | -9.16                                                         | -84.03                   | -97.24                               |
| hRAR $\beta$<br>(PDB ID: 4DM8)  | ATRA    | -11.39                                                        | -107.72                  | -120.46                              |
|                                 | 9cRA    | nd <sup>c</sup>                                               | -112.03                  | -106.37                              |
|                                 | Am80    | -10.22                                                        | -122.27                  | -121.47                              |
|                                 | LGD1069 | -9.92                                                         | -89.47                   | -110.30                              |
| hRAR $\gamma$<br>(PDB ID: 2LBD) | ATRA    | -14.13                                                        | -108.99                  | -117.13                              |
|                                 | 9cRA    | -12.23                                                        | -103.19                  | -113.72                              |
|                                 | Am80    | nb <sup>b</sup>                                               | nh <sup>d</sup>          | nh <sup>d</sup>                      |
|                                 | LGD1069 | -9.35                                                         | -60.91                   | -87.14                               |

<sup>a</sup> Ref. [1], <sup>b</sup> nb: does not bind, <sup>c</sup> nd: no data available, <sup>d</sup> nh: no hit

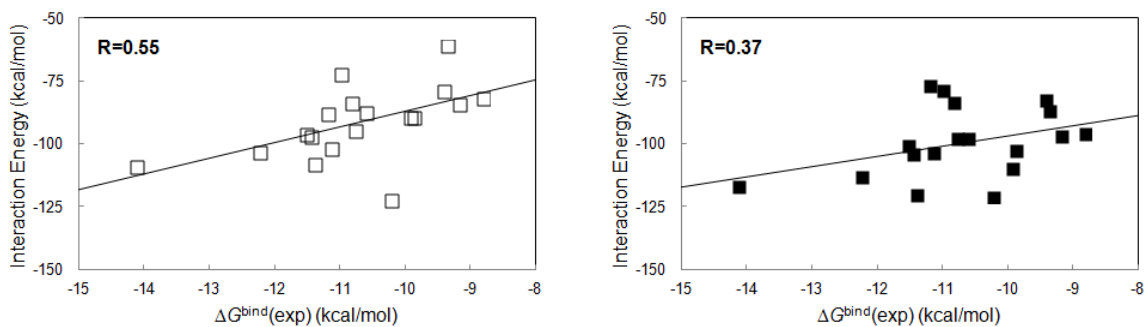

**Figure S1.** Correlations between  $\Delta G^{\text{bind}}(\text{exp})$  [1] and interaction energies of the most stable complex obtained from the docking simulations [2, 3] (left: the biomacromolecule-rigid and ligand-flexible conditions; right: the biomacromolecule- and ligand-flexible conditions) for the binding of the  $\alpha$ ,  $\beta$ , and  $\gamma$  subtypes of hRXR and hRAR LBDs with ATRA, 9cRA, Am80, and LGD1069.

**Table S2.** Receptor information used in this study [2].

| Receptor      | PDB ID | Ligand           | Resolution [Å] | State                                                         |
|---------------|--------|------------------|----------------|---------------------------------------------------------------|
| hRXR $\alpha$ | 1FM9   | 9cRA             | 2.1            | Heterodimer with hPPAR $\gamma$ LBD in agonist conformation   |
| hRXR $\beta$  | 1UHL   | MEI <sup>a</sup> | 2.9            | Heterodimer with hLXR $\alpha$ LBD in agonist conformation    |
| hRXR $\gamma$ | —      | 9cRA             | —              | Model using hRXR $\alpha$ LBD (1FM9) <sup>b</sup>             |
| hRAR $\alpha$ | 3A9E   | ATRA             | 2.75           | Heterodimer with mRXR $\alpha$ LBD in antagonist conformation |
| hRAR $\beta$  | 4DM8   | 9cRA             | 2.3            | Homodimer                                                     |
| hRAR $\gamma$ | 2LBD   | ATRA             | 2.0            | Monomer                                                       |

<sup>a</sup> MEI: methoprenic acid, <sup>b</sup> for preparation, see Ref. [2]

## References

1. Umemiya H, Fukasawa H, Ebisawa M, Eyrolles L, Kawachi E, Eisenmann G, Gronemeyer H, Hashimoto Y, Shudo K and Kagechika H (1997) Regulation of retinoidal actions by diazepinylbenzoic acids. Retinoid synergists which activate the RXR-RAR heterodimers. *J Med Chem* **40**, 4222–4234.
2. Tsuji M, Shudo K and Kagechika H (2015) Docking simulations suggest that all-*trans* retinoic acid could bind to retinoid X receptors. *J Comput Aided Mol Des* **29**, 975–988.
3. Tsuji M (2015) Docking Study with HyperChem, revision G1, Institute of Molecular Function, Saitama, Japan.
